# Supplementary material for: Association between Oxidative DNA Damage and Risk of Colorectal Cancer: Sensitive Determination of Urinary 8-Hydroxy-2′-deoxyguanosine by UPLC-MS/MS Analysis
Source: PubMed Central journal article supplement (PMC5009303; doi:10.1038/srep32581), 2016-09-02
Supplement: srep32581-s1.pdf [file srep32581-s1.pdf]

**Association between Oxidative DNA Damage and Risk of  
Colorectal Cancer: Sensitive Determination of Urinary  
8-Hydroxy-2'-deoxyguanosine by UPLC-MS/MS Analysis**

Cheng Guo<sup>1</sup>, Xiaofen Li<sup>1</sup>, Rong Wang<sup>1</sup>, Jiekai Yu<sup>1</sup>, Minfeng Ye<sup>1,2</sup>, Lingna Mao<sup>1,3</sup>,

Suzhan Zhang<sup>1</sup> and Shu Zheng<sup>1\*</sup>

<sup>1</sup>Cancer Institute (Key Laboratory of Cancer Prevention and Intervention, China National Ministry of Education, Key Laboratory of Molecular Biology in Medical Sciences, Zhejiang Province, China), The Second Affiliated Hospital, Zhejiang University School of Medicine, Hangzhou, Zhejiang 310009, China

<sup>2</sup>Department of Gastrointestinal Surgery, Shaoxing People's Hospital, Shaoxing Hospital of Zhejiang University, Shaoxing, Zhejiang 312000, China

<sup>3</sup>International Health Care Center, The Second Affiliated Hospital, Zhejiang University School of Medicine, Hangzhou, Zhejiang 310009, China

\*Corresponding author: Shu Zheng

Cancer Institute, The Second Affiliated Hospital, Zhejiang University School of Medicine, Jiefang Road 88#, Hangzhou, Zhejiang 310009, China.

Tel: +86-571-87784501; Fax: +86-571-87214404.

*E-mail address:* zhengshu@zju.edu.cn.

## Supplementary information

### Content

- **Figure S1. The collision-induced dissociation (CID) mass spectrum of 8-OHdG.**
- **Figure S2. Typical ESI-MS spectra of 8-OHdG when different additives were used.** Additives to mobile phase A: (a) 0.1% CH<sub>3</sub>COOH, (b) 2 mM CH<sub>3</sub>COONH<sub>4</sub>, (c) 2 mM CH<sub>3</sub>COONH<sub>4</sub>/CH<sub>3</sub>COOH, pH = 5.0, and (d) 2 mM CH<sub>3</sub>COONH<sub>4</sub>/NH<sub>4</sub>OH, pH = 9.0 were selected as examples for clarity. An isocratic elution of 92.5% A and 7.5% B was used, and the flow was set at 0.25 mL/min. The concentration of 8-OHdG standard was 20 μM, and the injection volume was 5.0 μL.
- **Figure S3. The chromatographic separation of 8-OHdG and dG.** The mobile phase consisted of solvents A (0.1% acetic acid) and B (pure methanol). An isocratic elution of 92.5% A and 7.5% B was used, and the flow was set at 0.25 mL/min. The concentration of 8-OHdG standard was 20 nM, and the injection volume was 5.0 μL.
- **Figure S4. Calibration curve of 8-OHdG standard obtained in water and human urine.**
- **Figure S5. ROC curve only using urinary 8-OHdG concentration.**
- **Table S1. Clinic information and urinary 8-OHdG concentration of healthy volunteers and patients with colorectal cancer.**
- **Table S2. The optimized MS conditions used for the analysis of 8-OHdG.**

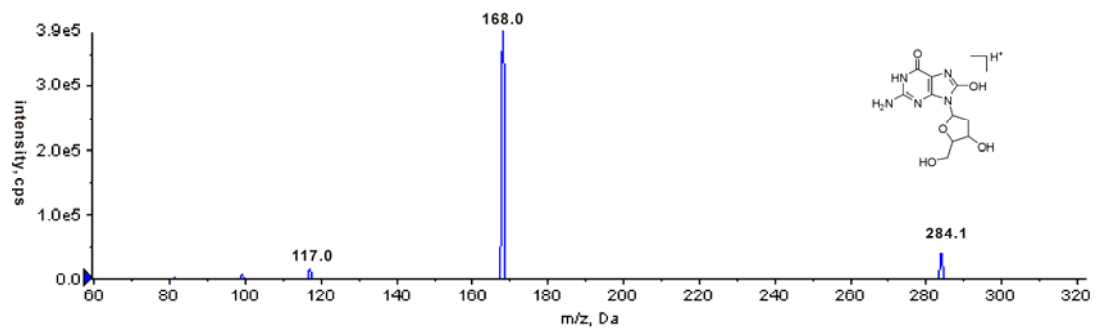

**Figure S1.** The collision-induced dissociation (CID) mass spectrum of 8-OHdG.

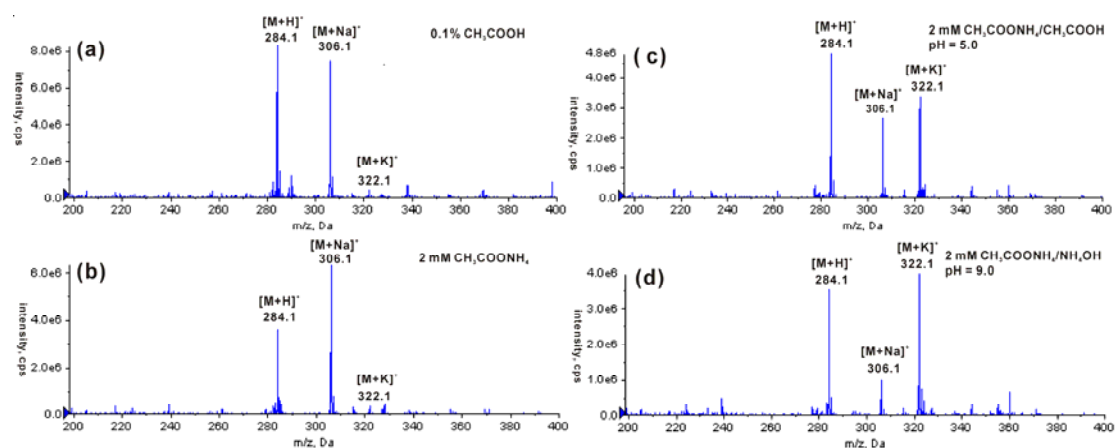

**Figure S2. Typical ESI-MS spectra of 8-OHdG when different additives were used.** Additives to mobile phase A: (a) 0.1% CH<sub>3</sub>COOH, (b) 2 mM CH<sub>3</sub>COONH<sub>4</sub>, (c) 2 mM CH<sub>3</sub>COONH<sub>4</sub>/CH<sub>3</sub>COOH, pH = 5.0, and (d) 2 mM CH<sub>3</sub>COONH<sub>4</sub>/NH<sub>4</sub>OH, pH = 9.0 were selected as examples for clarity. An isocratic elution of 92.5% A and 7.5% B was used, and the flow was set at 0.25 mL/min. The concentration of 8-OHdG standard was 20 μM, and the injection volume was 5.0 μL.

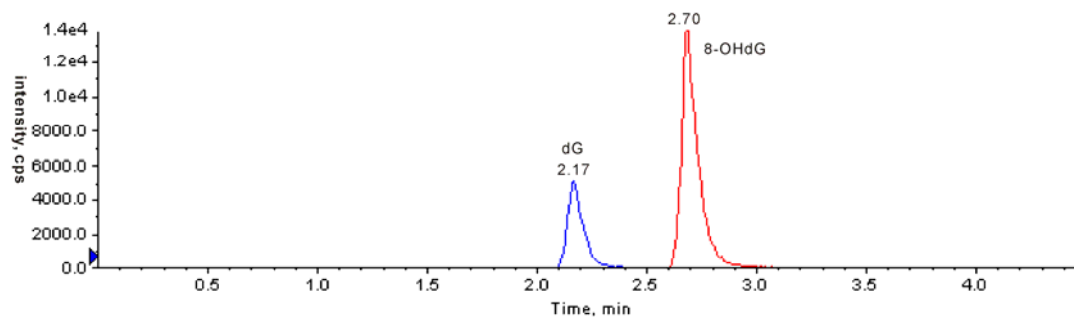

**Figure S3. The chromatographic separation of 8-OHdG and dG.** The mobile phase consisted of solvents A (0.1% acetic acid) and B (pure methanol). An isocratic elution of 92.5% A and 7.5% B was used, and the flow was set at 0.25 mL/min. The concentration of 8-OHdG standard was 20 nM, and the injection volume was 5.0  $\mu$ L.

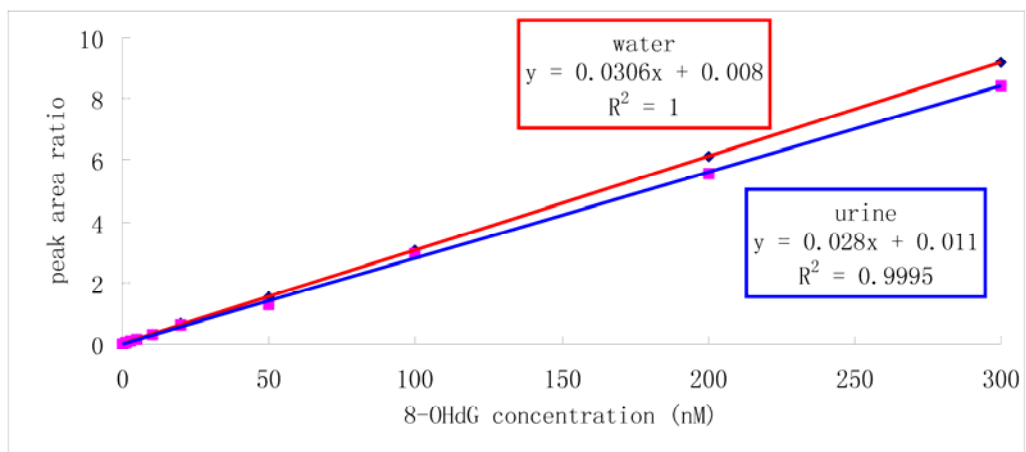

**Figure S4. Calibration curve of 8-OHdG standard obtained in water and human urine.**

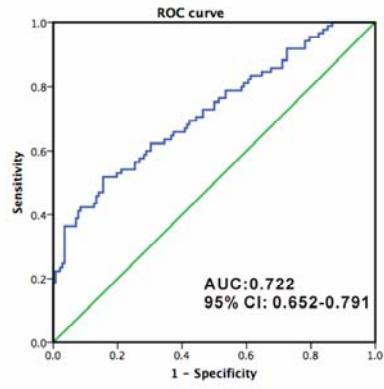

**Figure S5. ROC curve only using urinary 8-OHdG concentration.**

**Table S1. General information and urinary 8-OHdG concentration of healthy volunteers and patients with colorectal cancer.**

| No.       | Age<br>(years) | Sex | Urinary 8-OHdG concentration<br>(nmol/mmol creatinine) |
|-----------|----------------|-----|--------------------------------------------------------|
| Normal-1  | 29             | M   | 0.942±0.043                                            |
| Normal-2  | 27             | F   | 0.798±0.025                                            |
| Normal-3  | 27             | F   | 1.077±0.025                                            |
| Normal-4  | 51             | F   | 1.372±0.015                                            |
| Normal-5  | 55             | F   | 1.097±0.032                                            |
| Normal-6  | 39             | M   | 0.518±0.027                                            |
| Normal-7  | 29             | M   | 1.461±0.053                                            |
| Normal-8  | 30             | M   | 1.852±0.036                                            |
| Normal-9  | 39             | M   | 0.791±0.014                                            |
| Normal-10 | 42             | M   | 1.918±0.059                                            |
| Normal-11 | 36             | F   | 1.552±0.026                                            |
| Normal-12 | 36             | M   | 0.884±0.029                                            |
| Normal-13 | 37             | M   | 0.882±0.023                                            |
| Normal-14 | 29             | M   | 0.690±0.019                                            |
| Normal-15 | 37             | M   | 0.472±0.019                                            |
| Normal-16 | 31             | M   | 1.426±0.086                                            |
| Normal-17 | 37             | M   | 0.306±0.008                                            |
| Normal-18 | 51             | F   | 0.625±0.017                                            |
| Normal-19 | 30             | F   | 0.730±0.017                                            |
| Normal-20 | 26             | M   | 1.288±0.097                                            |
| Normal-21 | 57             | M   | 1.025±0.026                                            |
| Normal-22 | 56             | M   | 1.035±0.005                                            |
| Normal-23 | 29             | F   | 0.467±0.005                                            |
| Normal-24 | 35             | M   | 0.514±0.025                                            |
| Normal-25 | 73             | M   | 1.166±0.018                                            |
| Normal-26 | 83             | M   | 0.447±0.011                                            |
| Normal-27 | 63             | M   | 0.964±0.019                                            |
| Normal-28 | 71             | M   | 0.296±0.006                                            |
| Normal-29 | 46             | F   | 1.364±0.015                                            |
| Normal-30 | 86             | M   | 0.769±0.011                                            |
| Normal-31 | 67             | M   | 0.935±0.071                                            |
| Normal-32 | 65             | M   | 1.242±0.073                                            |
| Normal-33 | 67             | M   | 0.294±0.013                                            |
| Normal-34 | 58             | M   | 1.172±0.045                                            |
| Normal-35 | 71             | M   | 0.263±0.014                                            |
| Normal-36 | 59             | M   | 0.788±0.022                                            |
| Normal-37 | 65             | M   | 2.312±0.100                                            |
| Normal-38 | 47             | M   | 0.785±0.023                                            |



---

|           |    |   |             |
|-----------|----|---|-------------|
| Normal-39 | 50 | F | 0.938±0.053 |
| Normal-40 | 80 | M | 0.821±0.008 |
| Normal-41 | 57 | M | 1.298±0.028 |
| Normal-42 | 72 | M | 1.937±0.215 |
| Normal-43 | 50 | F | 0.234±0.007 |
| Normal-44 | 53 | M | 0.721±0.036 |
| Normal-45 | 47 | F | 1.001±0.020 |
| Normal-46 | 37 | M | 1.152±0.007 |
| Normal-47 | 49 | M | 0.771±0.001 |
| Normal-48 | 40 | M | 0.664±0.014 |
| Normal-49 | 52 | F | 1.130±0.064 |
| Normal-50 | 48 | M | 0.541±0.023 |
| Normal-51 | 48 | M | 0.728±0.011 |
| Normal-52 | 52 | M | 0.814±0.034 |
| Normal-53 | 47 | M | 0.564±0.028 |
| Normal-54 | 42 | M | 0.910±0.027 |
| Normal-55 | 62 | F | 0.870±0.010 |
| Normal-56 | 53 | M | 1.491±0.036 |
| Normal-57 | 41 | F | 0.702±0.070 |
| Normal-58 | 62 | M | 0.667±0.024 |
| Normal-59 | 52 | M | 1.627±0.050 |
| Normal-60 | 44 | F | 0.901±0.022 |
| Normal-61 | 51 | F | 0.488±0.023 |
| Normal-62 | 35 | F | 0.827±0.015 |
| Normal-63 | 39 | F | 0.835±0.023 |
| Normal-64 | 47 | F | 0.464±0.003 |
| Normal-65 | 41 | F | 1.396±0.012 |
| Normal-66 | 50 | F | 0.869±0.030 |
| Normal-67 | 41 | F | 1.072±0.033 |
| Normal-68 | 55 | F | 1.105±0.045 |
| Normal-69 | 43 | F | 1.107±0.021 |
| Normal-70 | 48 | F | 0.588±0.063 |
| Normal-71 | 35 | F | 1.722±0.070 |
| Normal-72 | 52 | F | 1.049±0.055 |
| Normal-73 | 55 | F | 1.654±0.084 |
| Normal-74 | 46 | F | 0.441±0.017 |
| Normal-75 | 42 | F | 0.481±0.026 |
| Normal-76 | 50 | F | 1.181±0.028 |
| Normal-77 | 45 | F | 1.758±0.010 |
| Normal-78 | 64 | F | 1.696±0.049 |
| Normal-79 | 41 | F | 1.288±0.047 |
| Normal-80 | 60 | F | 1.932±0.053 |
| Normal-81 | 38 | F | 0.981±0.097 |
| Normal-82 | 42 | F | 1.415±0.059 |

---

---

|            |    |   |             |
|------------|----|---|-------------|
| Normal-83  | 57 | F | 0.699±0.013 |
| Normal-84  | 47 | F | 1.908±0.037 |
| Normal-85  | 36 | F | 0.918±0.026 |
| Normal-86  | 41 | F | 0.326±0.019 |
| Normal-87  | 51 | F | 1.233±0.036 |
| Normal-88  | 44 | F | 0.425±0.035 |
| Normal-89  | 47 | M | 1.218±0.020 |
| Normal-90  | 52 | M | 1.568±0.018 |
| Normal-91  | 39 | F | 0.241±0.013 |
| Normal-92  | 45 | F | 0.474±0.022 |
| Normal-93  | 48 | F | 1.399±0.061 |
| Normal-94  | 50 | M | 1.073±0.113 |
| Normal-95  | 50 | F | 1.644±0.058 |
| Normal-96  | 26 | F | 0.964±0.008 |
| Normal-97  | 47 | F | 0.573±0.046 |
| Normal-98  | 26 | F | 0.704±0.020 |
| Normal-99  | 32 | F | 1.611±0.032 |
| Normal-100 | 23 | F | 1.037±0.028 |
| Normal-101 | 49 | F | 1.341±0.070 |
| Normal-102 | 21 | F | 1.034±0.015 |
| Normal-103 | 40 | F | 0.870±0.017 |
| Normal-104 | 48 | F | 0.312±0.025 |
| Normal-105 | 48 | F | 1.722±0.070 |
| Normal-106 | 47 | M | 2.334±0.070 |
| Normal-107 | 41 | F | 0.235±0.012 |
| Normal-108 | 45 | F | 0.961±0.011 |
| Normal-109 | 37 | F | 0.997±0.035 |
| Normal-110 | 49 | M | 1.935±0.048 |
| Normal-111 | 51 | F | 1.491±0.050 |
| Normal-112 | 31 | F | 0.612±0.058 |
| Normal-113 | 50 | M | 0.787±0.057 |
| Normal-114 | 41 | M | 2.254±0.034 |
| Normal-115 | 50 | M | 0.977±0.021 |
| Normal-116 | 45 | M | 1.182±0.033 |
| Normal-117 | 59 | M | 1.181±0.056 |
| Normal-118 | 41 | M | 1.043±0.036 |
| Normal-119 | 47 | M | 1.465±0.075 |
| Normal-120 | 45 | M | 1.154±0.079 |
| Normal-121 | 40 | M | 2.240±0.087 |
| Normal-122 | 37 | M | 0.872±0.028 |
| Normal-123 | 37 | F | 0.731±0.013 |
| Normal-124 | 39 | M | 1.501±0.043 |
| Normal-125 | 51 | M | 1.210±0.024 |
| Normal-126 | 62 | M | 2.461±0.163 |

---

---

|            |    |   |             |
|------------|----|---|-------------|
| Normal-127 | 47 | M | 1.402±0.066 |
| Normal-128 | 46 | M | 1.200±0.044 |
| Normal-129 | 58 | M | 1.528±0.046 |
| Normal-130 | 30 | F | 1.686±0.034 |
| Normal-131 | 49 | M | 1.167±0.107 |
| Normal-132 | 40 | M | 1.252±0.048 |
| Normal-133 | 55 | M | 0.856±0.042 |
| Normal-134 | 53 | M | 1.684±0.113 |
| Normal-135 | 40 | M | 1.149±0.036 |
| Normal-136 | 44 | M | 1.315±0.038 |
| Normal-137 | 45 | F | 0.276±0.026 |
| Normal-138 | 40 | F | 0.602±0.032 |
| Normal-139 | 66 | M | 1.710±0.087 |
| Normal-140 | 68 | M | 1.124±0.049 |
| Normal-141 | 43 | F | 0.569±0.072 |
| Normal-142 | 41 | M | 1.409±0.092 |
| CRC-1      | 51 | F | 0.518±0.067 |
| CRC-2      | 58 | M | 1.449±0.025 |
| CRC-3      | 57 | M | 0.567±0.017 |
| CRC-4      | 52 | F | 1.994±0.112 |
| CRC-5      | 58 | M | 1.573±0.035 |
| CRC-6      | 63 | F | 1.576±0.076 |
| CRC-7      | 65 | M | 0.875±0.030 |
| CRC-8      | 64 | M | 1.109±0.035 |
| CRC-9      | 66 | F | 0.905±0.009 |
| CRC-10     | 67 | F | 2.247±0.063 |
| CRC-11     | 58 | F | 1.082±0.031 |
| CRC-12     | 74 | M | 0.506±0.008 |
| CRC-13     | 57 | F | 1.645±0.053 |
| CRC-14     | 62 | M | 2.418±0.074 |
| CRC-15     | 67 | M | 1.904±0.066 |
| CRC-16     | 58 | M | 2.153±0.098 |
| CRC-17     | 48 | F | 0.970±0.042 |
| CRC-18     | 45 | F | 0.812±0.011 |
| CRC-19     | 82 | M | 0.768±0.020 |
| CRC-20     | 78 | F | 1.783±0.065 |
| CRC-21     | 62 | M | 2.080±0.078 |
| CRC-22     | 73 | F | 2.475±0.103 |
| CRC-23     | 52 | M | 1.031±0.022 |
| CRC-24     | 48 | M | 0.641±0.010 |
| CRC-25     | 69 | M | 1.627±0.098 |
| CRC-26     | 74 | M | 1.057±0.013 |
| CRC-27     | 53 | M | 1.595±0.080 |
| CRC-28     | 83 | F | 1.662±0.072 |

---

---

|        |    |   |             |
|--------|----|---|-------------|
| CRC-29 | 71 | M | 0.778±0.078 |
| CRC-30 | 70 | F | 0.684±0.014 |
| CRC-31 | 58 | F | 2.206±0.135 |
| CRC-32 | 57 | M | 0.676±0.016 |
| CRC-33 | 82 | F | 0.883±0.029 |
| CRC-34 | 66 | F | 1.179±0.039 |
| CRC-35 | 74 | M | 2.348±0.149 |
| CRC-36 | 62 | F | 1.393±0.050 |
| CRC-37 | 54 | F | 1.373±0.092 |
| CRC-38 | 53 | F | 0.574±0.011 |
| CRC-39 | 31 | M | 1.192±0.014 |
| CRC-40 | 76 | M | 1.128±0.076 |
| CRC-41 | 49 | F | 1.031±0.780 |
| CRC-42 | 25 | M | 1.138±0.127 |
| CRC-43 | 68 | M | 1.060±0.038 |
| CRC-44 | 69 | M | 1.994±0.091 |
| CRC-45 | 69 | M | 4.370±0.281 |
| CRC-46 | 76 | M | 0.966±0.024 |
| CRC-47 | 61 | M | 3.567±0.216 |
| CRC-48 | 63 | M | 1.895±0.112 |
| CRC-49 | 69 | F | 1.469±0.030 |
| CRC-50 | 67 | M | 2.541±0.116 |
| CRC-51 | 76 | F | 2.990±0.016 |
| CRC-52 | 67 | F | 1.253±0.030 |
| CRC-53 | 65 | F | 2.511±0.069 |
| CRC-54 | 78 | F | 0.754±0.005 |
| CRC-55 | 34 | M | 3.657±0.062 |
| CRC-56 | 55 | M | 0.753±0.024 |
| CRC-57 | 42 | F | 1.307±0.020 |
| CRC-58 | 64 | F | 2.162±0.057 |
| CRC-59 | 77 | F | 2.584±0.060 |
| CRC-60 | 50 | F | 1.850±0.063 |
| CRC-61 | 72 | F | 0.835±0.043 |
| CRC-62 | 52 | M | 3.224±0.060 |
| CRC-63 | 67 | M | 1.954±0.037 |
| CRC-64 | 67 | F | 2.302±0.193 |
| CRC-65 | 84 | F | 2.016±0.030 |
| CRC-66 | 52 | M | 1.955±0.050 |
| CRC-67 | 77 | M | 0.782±0.011 |
| CRC-68 | 60 | F | 1.167±0.022 |
| CRC-69 | 58 | F | 1.738±0.036 |
| CRC-70 | 67 | F | 2.750±0.205 |
| CRC-71 | 53 | F | 1.284±0.018 |
| CRC-72 | 87 | M | 2.826±0.081 |

---

---

|        |    |   |             |
|--------|----|---|-------------|
| CRC-73 | 45 | F | 1.644±0.067 |
| CRC-74 | 77 | M | 1.346±0.036 |
| CRC-75 | 65 | M | 0.998±0.031 |
| CRC-76 | 57 | M | 2.362±0.069 |
| CRC-77 | 65 | F | 2.531±0.051 |
| CRC-78 | 53 | M | 2.571±0.084 |
| CRC-79 | 57 | M | 2.075±0.056 |
| CRC-80 | 82 | M | 0.914±0.032 |
| CRC-81 | 50 | M | 3.262±0.068 |
| CRC-82 | 85 | M | 1.296±0.046 |
| CRC-83 | 83 | F | 1.577±0.029 |
| CRC-84 | 73 | M | 4.103±0.077 |

---

**Table S2. The optimized MS conditions used for the analysis of 8-OHdG.**

| Compound                               | MRM<br>ion transition ( $m/z$ ) | DP (V) | CE (V) | EP (V) | CXP (V) |
|----------------------------------------|---------------------------------|--------|--------|--------|---------|
| 8-OHdG                                 | 284.1>168.0                     | 45.0   | 18.0   | 10.0   | 13.0    |
|                                        | 284.1>117.0                     | 45.0   | 22.0   | 10.0   | 5.0     |
| [ <sup>15</sup> N <sub>5</sub> ]8-OHdG | 289.1>173.0                     | 45.0   | 18.0   | 10.0   | 13.0    |

*DP* declustering potential, *CE* collision energy, *EP* entrance potential, *CXP* collision cell exit potential
